# Supplementary material for: Dental Caries and the Erosive Tooth Wear Status of 12-Year-Old Children in Jakarta, Indonesia
Source: PubMed Central journal article supplement (PMC6720660; doi:10.3390/ijerph16162994), 2019-08-20
Supplement: ijerph-16-02994-s001.pdf [file ijerph-16-02994-s001.pdf]

## Oral Health Questionnaire

Child name :

Gender :  Male  Female

Place and date of birth:

Class and School:

Caregiver :

Contact number (for further follow-up):

The educational level of the parents who live with the child:

|                   | Father                   | Mother                   |
|-------------------|--------------------------|--------------------------|
| Primary or lower  | <input type="checkbox"/> | <input type="checkbox"/> |
| Secondary         | <input type="checkbox"/> | <input type="checkbox"/> |
| College or higher | <input type="checkbox"/> | <input type="checkbox"/> |

How often does your child brush his/her teeth?

- Never / irregularly
- Once a day
- Twice a day
- Three times a day or more

### Part A: Dietary habit of your child

- 1) How often does your child have soft drinks?
  - 6, 7 times a week or more (almost every day or more)
  - 3 times a week (alternate days)
  - Once a week
  - Less than once a week / never
- 2) How often does your child have citric tea / drinks containing lemon?
  - 6, 7 times a week or more (almost every day or more)
  - 3 times a week (alternate days)
  - Once a week
  - Less than once a week / never
- 3) How often does your child drink fruit juice?
  - 6, 7 times a week or more (almost every day or more)
  - 3 times a week (alternate days)
  - Once a week
  - Less than once a week / never
- 4) How often does your child have vitamin C supplement drinks?
  - 6, 7 times a week or more (almost every day or more)
  - 3 times a week (alternate days)
  - Once a week
  - Less than once a week / never

- 5) How often does your child have chewing gum?
- 6, 7 times a week or more (almost every day or more)
  - 3 times a week (alternate days)
  - Once a week
  - Less than once a week / never

**Pert B: Parent's oral health knowledge**

|                                                       | Yes                      | No                       | Don't know               |
|-------------------------------------------------------|--------------------------|--------------------------|--------------------------|
| 1) The causes of dental decay include:                |                          |                          |                          |
| a) Too much consumption of candies                    | <input type="checkbox"/> | <input type="checkbox"/> | <input type="checkbox"/> |
| b) Unclean teeth                                      | <input type="checkbox"/> | <input type="checkbox"/> | <input type="checkbox"/> |
| c) Tooth worms attack                                 | <input type="checkbox"/> | <input type="checkbox"/> | <input type="checkbox"/> |
| d) "Hot air"                                          | <input type="checkbox"/> | <input type="checkbox"/> | <input type="checkbox"/> |
| 2) Preventions of tooth decay include:                |                          |                          |                          |
| a) Using miswak                                       | <input type="checkbox"/> | <input type="checkbox"/> | <input type="checkbox"/> |
| b) Gargle with salted water                           | <input type="checkbox"/> | <input type="checkbox"/> | <input type="checkbox"/> |
| c) Use of fluoridated toothpaste                      | <input type="checkbox"/> | <input type="checkbox"/> | <input type="checkbox"/> |
| d) Decrease frequency of sugar consumption            | <input type="checkbox"/> | <input type="checkbox"/> | <input type="checkbox"/> |
| 3) Effects of fluoride to teeth include:              |                          |                          |                          |
| a) No effect                                          | <input type="checkbox"/> | <input type="checkbox"/> | <input type="checkbox"/> |
| b) Prevent tooth decay                                | <input type="checkbox"/> | <input type="checkbox"/> | <input type="checkbox"/> |
| c) Tooth whitening                                    | <input type="checkbox"/> | <input type="checkbox"/> | <input type="checkbox"/> |
| d) Prevent periodontal disease                        | <input type="checkbox"/> | <input type="checkbox"/> | <input type="checkbox"/> |
| 4) Which of the following food can cause tooth decay? |                          |                          |                          |
| a) Soft drinks                                        | <input type="checkbox"/> | <input type="checkbox"/> | <input type="checkbox"/> |
| b) Ice-cream                                          | <input type="checkbox"/> | <input type="checkbox"/> | <input type="checkbox"/> |
| c) Cheese                                             | <input type="checkbox"/> | <input type="checkbox"/> | <input type="checkbox"/> |
| d) Peanuts                                            | <input type="checkbox"/> | <input type="checkbox"/> | <input type="checkbox"/> |
| 5) The causes of gum bleeding include:                |                          |                          |                          |
| a) Unclean teeth                                      | <input type="checkbox"/> | <input type="checkbox"/> | <input type="checkbox"/> |
| b) It is a normal phenomenon                          | <input type="checkbox"/> | <input type="checkbox"/> | <input type="checkbox"/> |
| 6) Methods to prevent periodontal disease include:    |                          |                          |                          |
| a) Tooth brushing                                     | <input type="checkbox"/> | <input type="checkbox"/> | <input type="checkbox"/> |
| b) Saline mouth-rinsing                               | <input type="checkbox"/> | <input type="checkbox"/> | <input type="checkbox"/> |
| c) Regular scaling (professional tooth cleaning)      | <input type="checkbox"/> | <input type="checkbox"/> | <input type="checkbox"/> |
